# Supplementary material for: Consequences of twisting of the flexible arms of imidazole-derived urea in zinc-dicarboxylate coordination polymers
Source: Royal Society of Chemistry journal article supplement (doi:10.1039/d4ce00005f), 2024-01-01
Supplement: d4ce00005f1.pdf [file d4ce00005f1.pdf]

# Supporting Information

## Consequences of Twisting of flexible arms of imidazole derived urea in zinc-dicarboxylate coordination polymers

Satyendra Verma, Rinki Brahma and Jubaraj B. Baruah\*

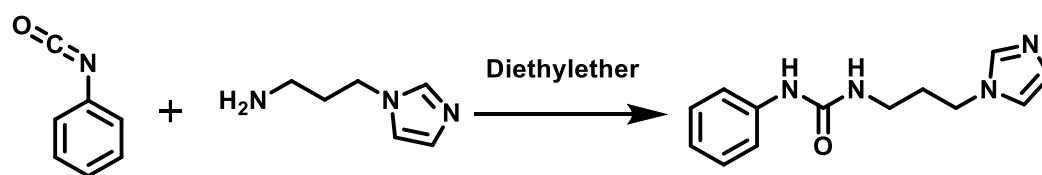

Scheme 1S: Reaction for the synthesis of the *imidaurea*

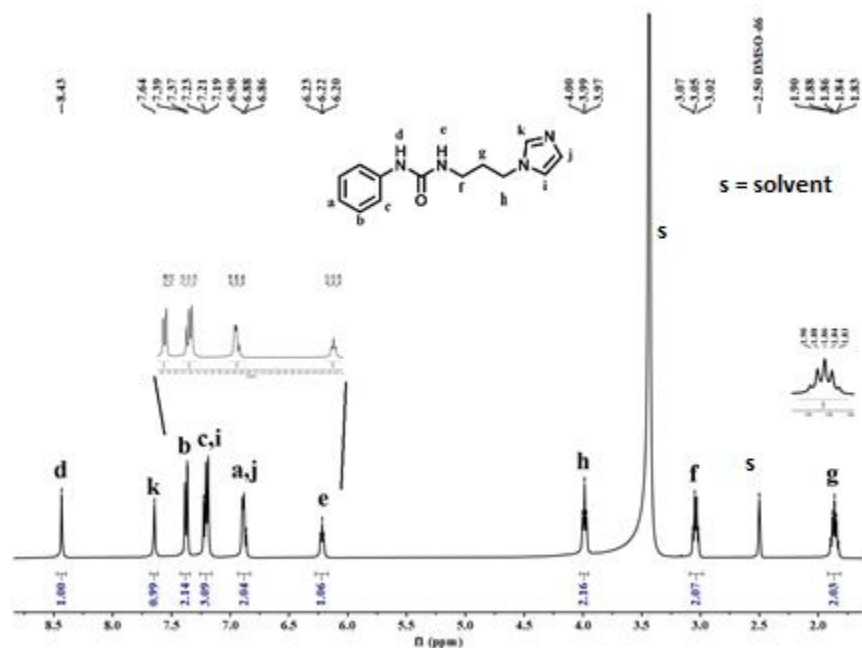

Figure 1S:  $^1\text{H}$ NMR spectra (500 MHz,  $\text{DMSO-d}_6$ ) of the *imidaurea*.

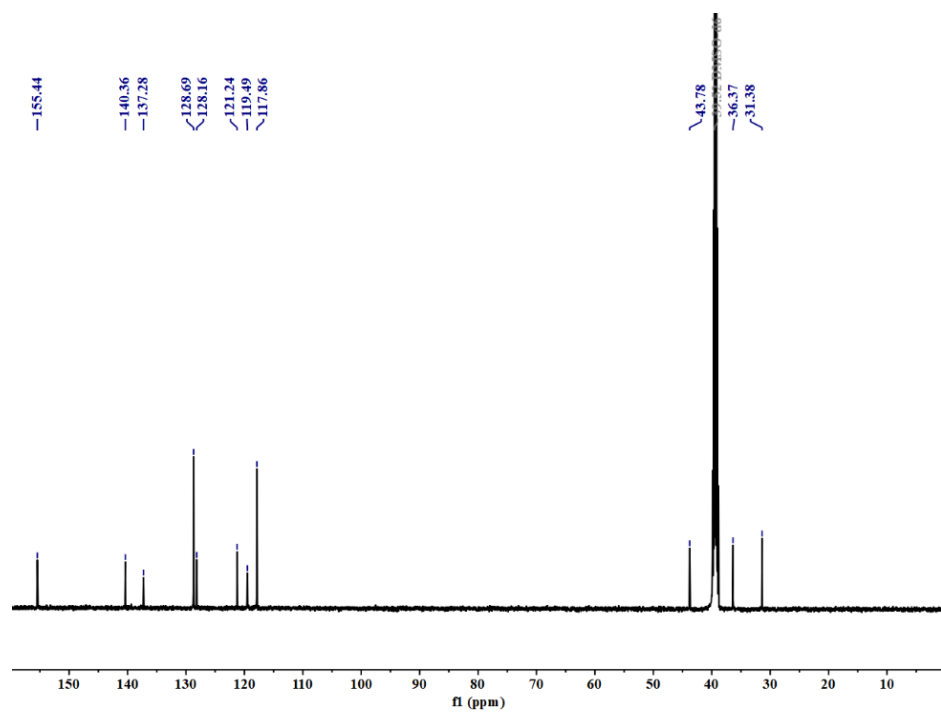

Figure 2S:  $^{13}\text{C}$ NMR (DMSO- $\text{d}_6$ , 125 MHz) spectra of the *imidaurea*.

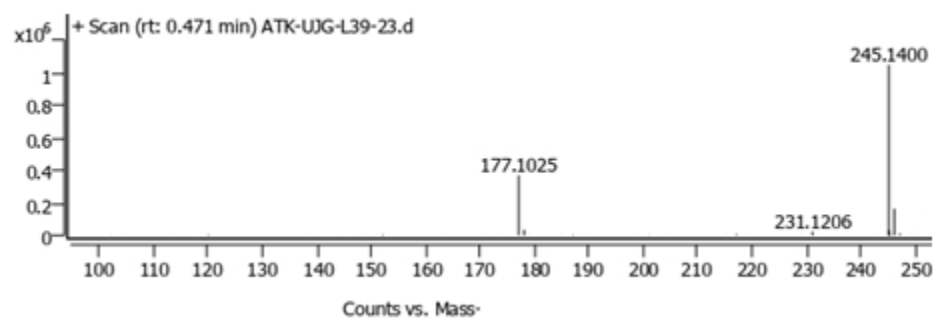

Figure 3S: High resolution mass spectra of *imidaurea*

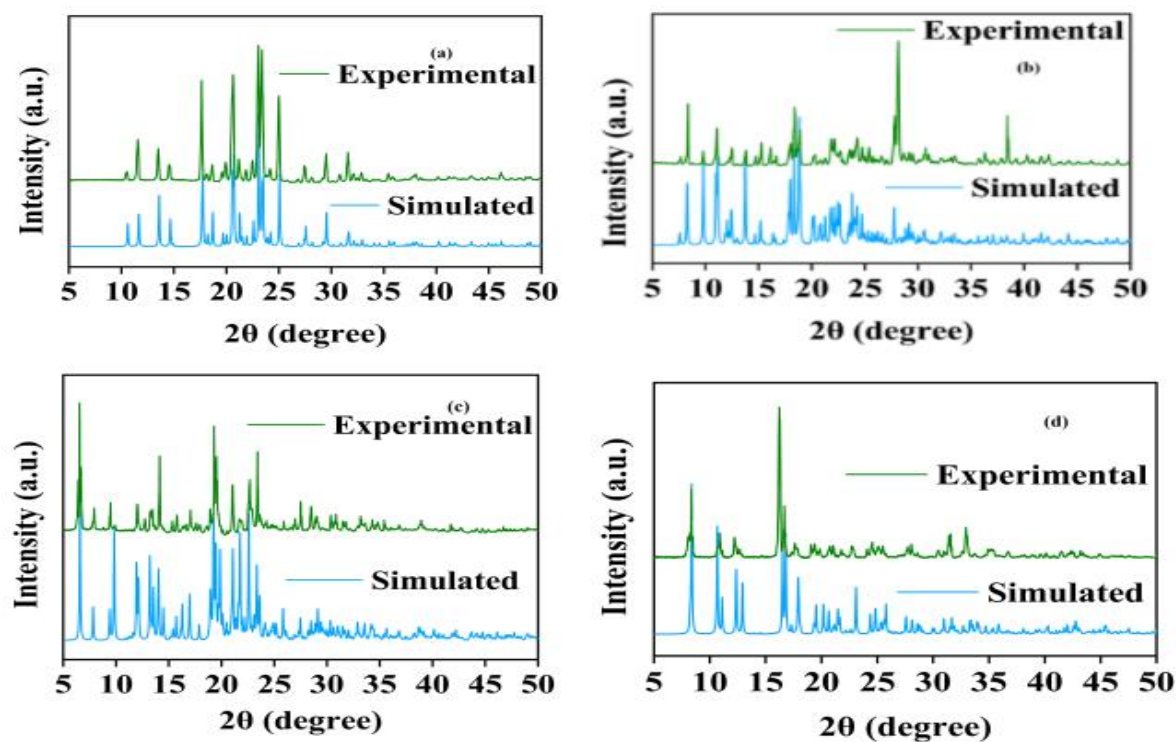

Figure 4S: Powder X-ray diffraction patterns of the (a) *imidaurea*, (b) **CP1**, (c) **CP2**, (d) **CP3** (Green = Experimental, Blue = Simulated). Simulated pattern generated from CIF file).

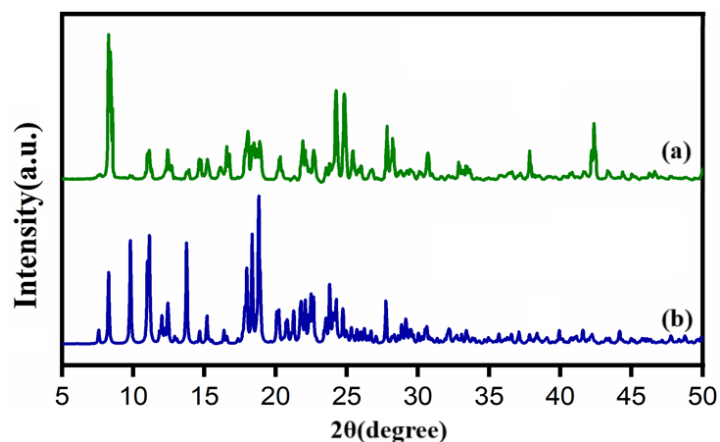

Figure 5S : Powder X-ray diffraction patterns of (a) CP2 after heating at 150° C for two days, and (b) simulated pattern of CP1.

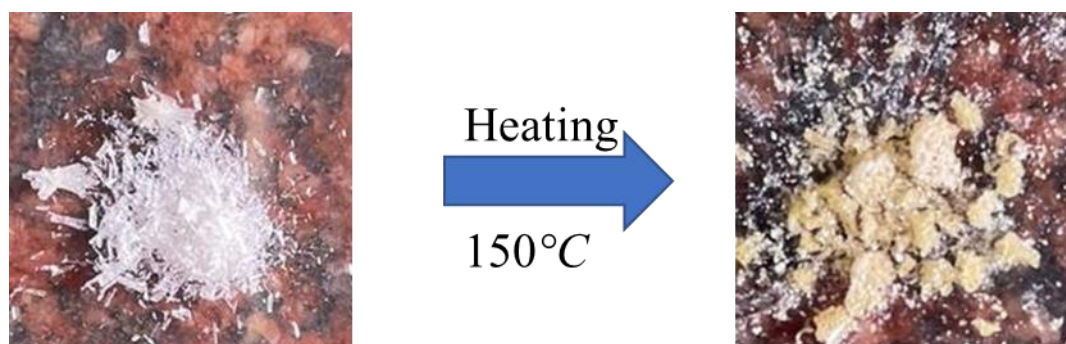

Figure 6S: Photographs of the CP2 and of the CP2 heat treated at 150° C for two days.

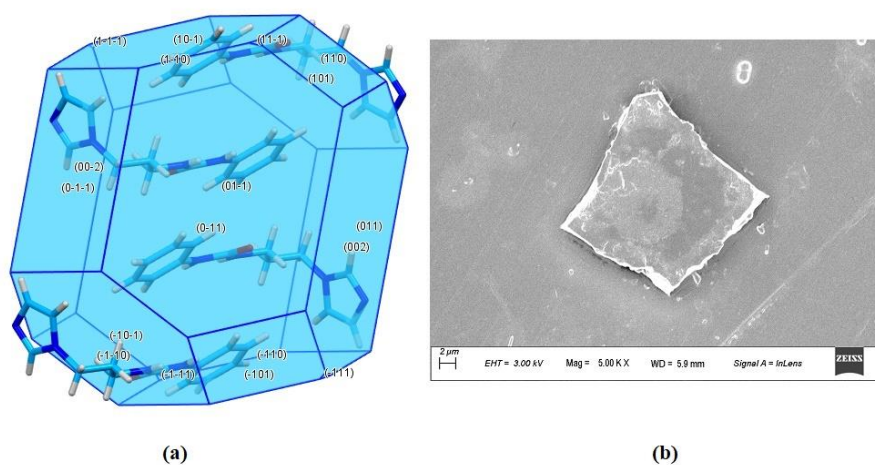

Figure 7S : (a) Bravais, Friedel, Donnay and Harker crystal morphology of *imidaurea*; (b) scanning electron microscopy image of the *imidaurea*.

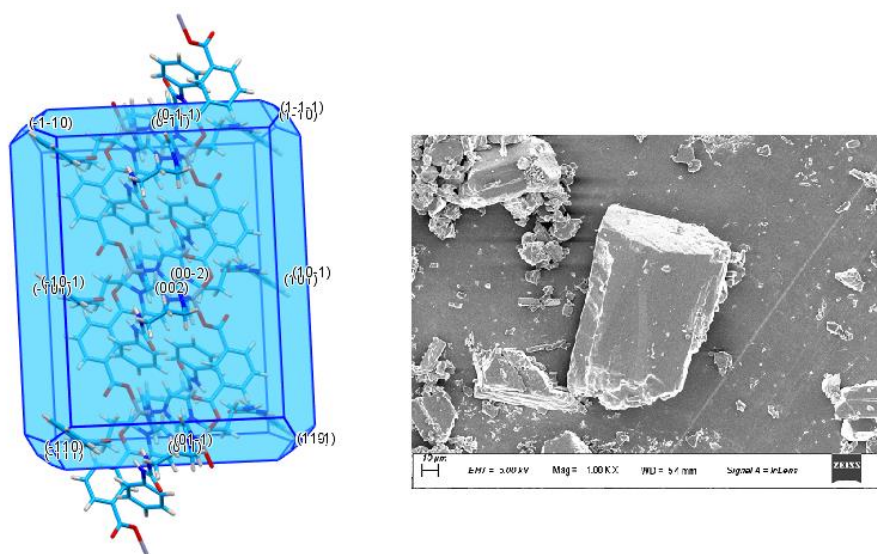

(b)

Figure 8S : (a) Bravais, Friedel, Donnay and Harker crystal morphology of **CP1**; (b) scanning electron microscopy image of the **CP1**.

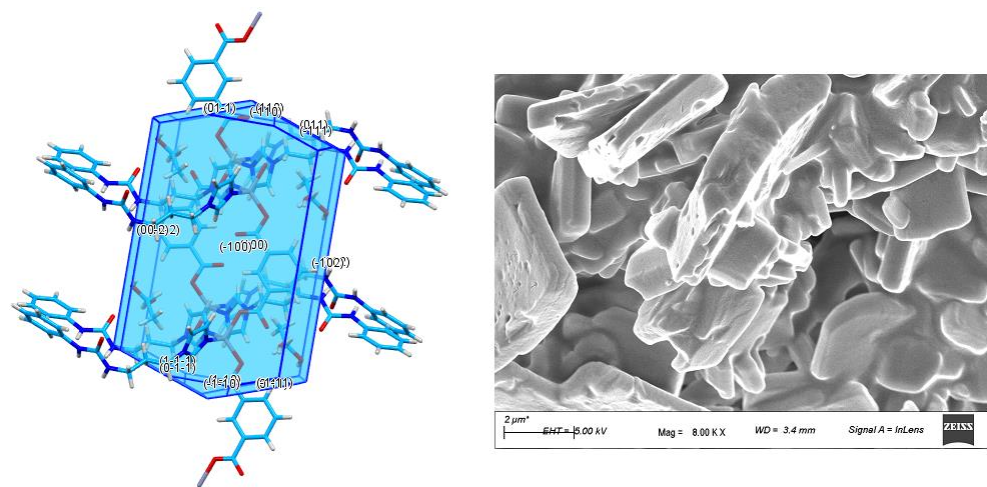

(b)

Figure 9S : (a) Bravais, Friedel, Donnay and Harker crystal morphology of **CP2**; (b) scanning electron microscopy image of the **CP2**.

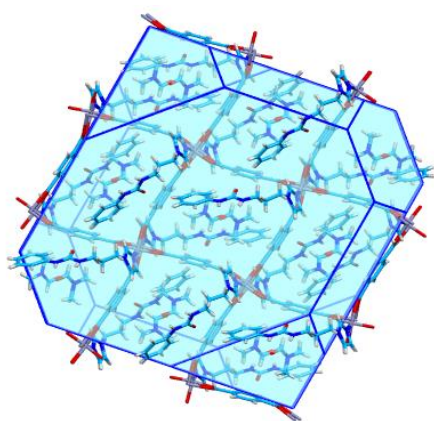

(g)

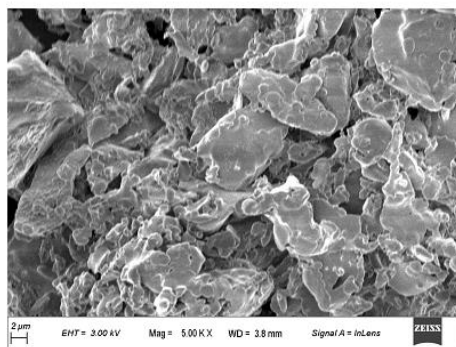

(h)

Figure 10S : (a) Bravais, Friedel, Donnay and Harker crystal morphology of **CP3**; (b) scanning electron microscopy image of the **CP3**.

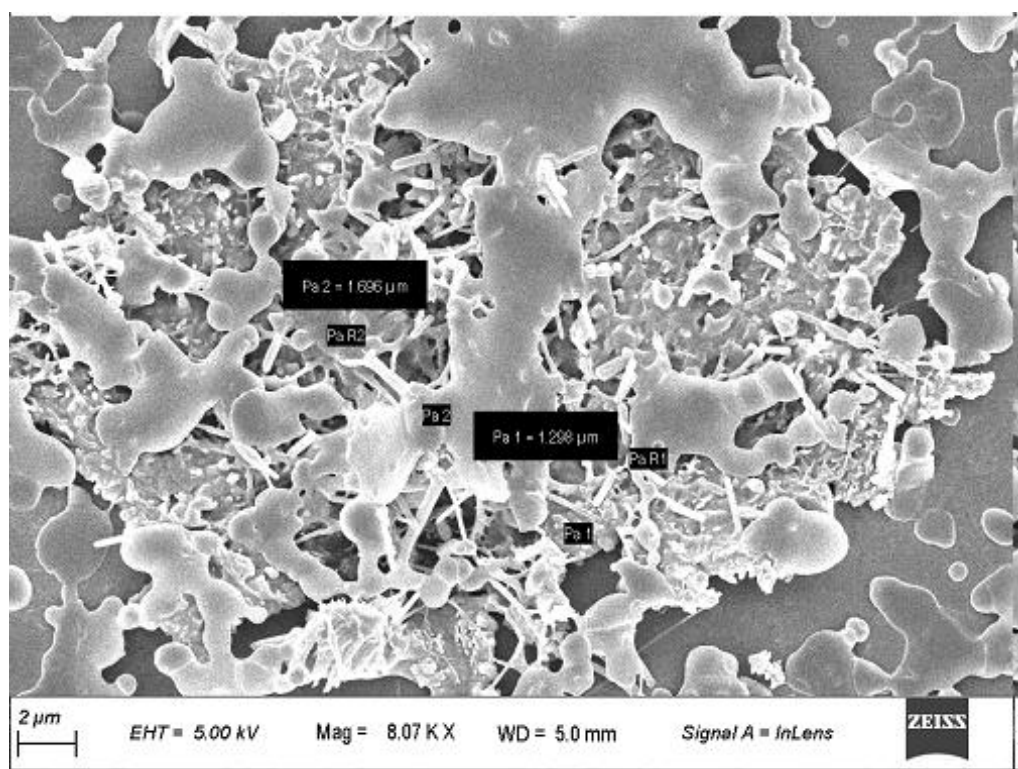

Figure 11S: Scanning electron microscopic image of heat treated at 150° C for two days of **CP2**.

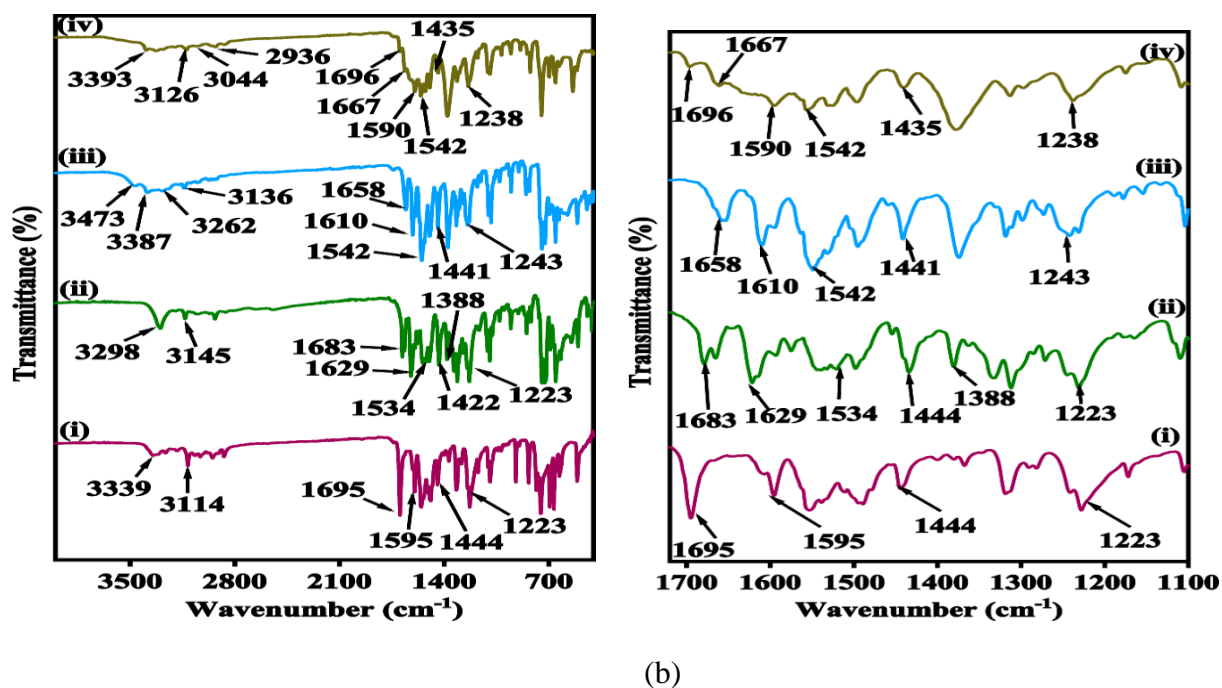

Figure 12S: (a) IR-spectra, and (b) expansion of the IR-spectra of the solid samples of (i) *imidaurea*, (ii) **CP1**, (iii) **CP2**, (iv) **CP3**.

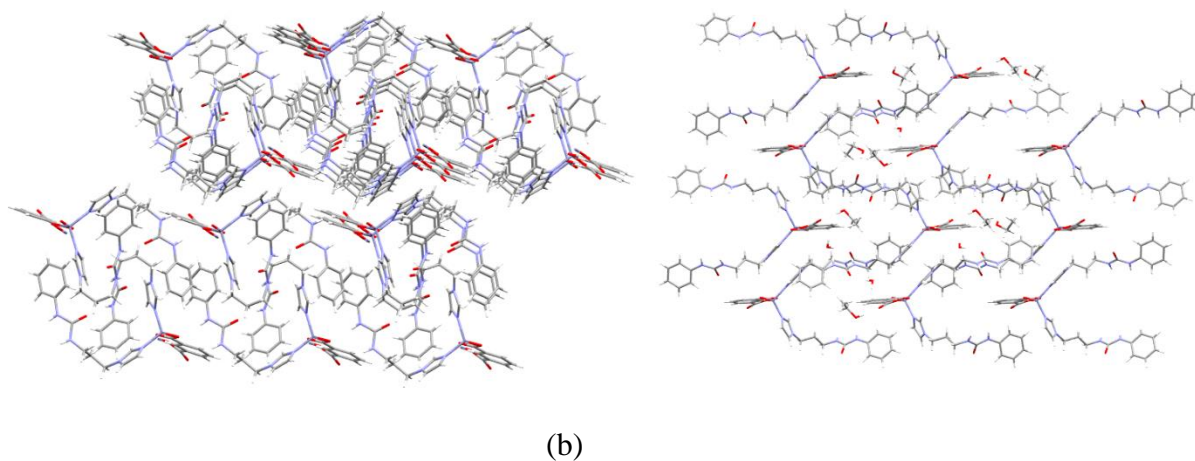

Figure 13S: Packing patterns showing (a) layer-like assemblies of bunches in the **CP1**, and (b) inter-chain inclusion in clefts in chains in the **CP2**.

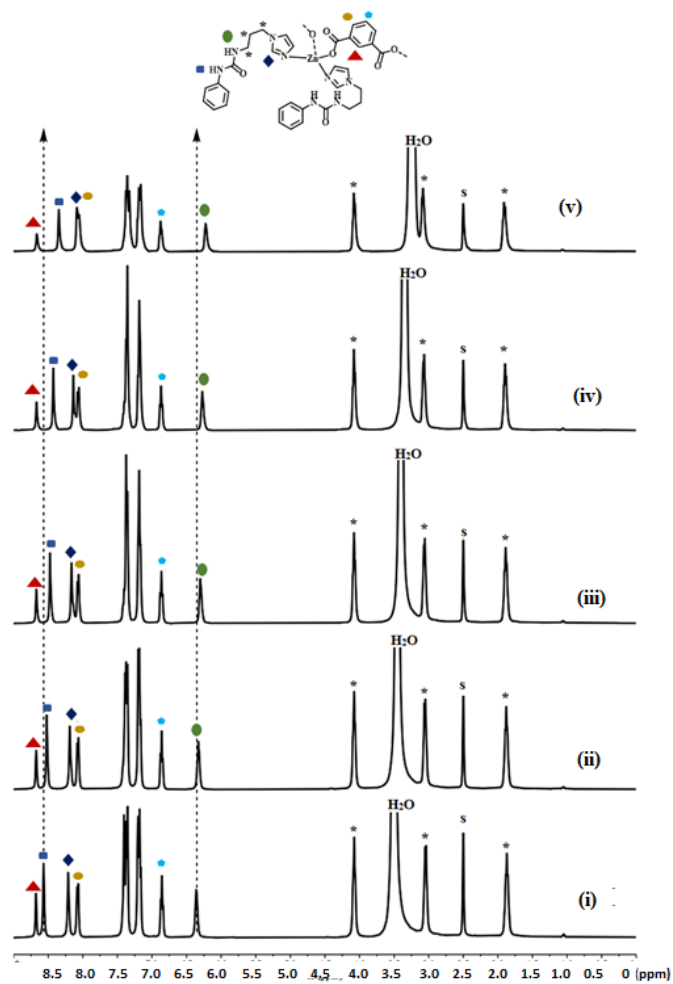

Figure 14S:  $^1\text{H}$ NMR spectra (500 MHz) of the **CP1** in  $\text{DMSO-d}_6$  at (a) 293.15K, (b) 303.15K, (iii) 313.15K, (iv) 323.15K, (v) 333.15K.

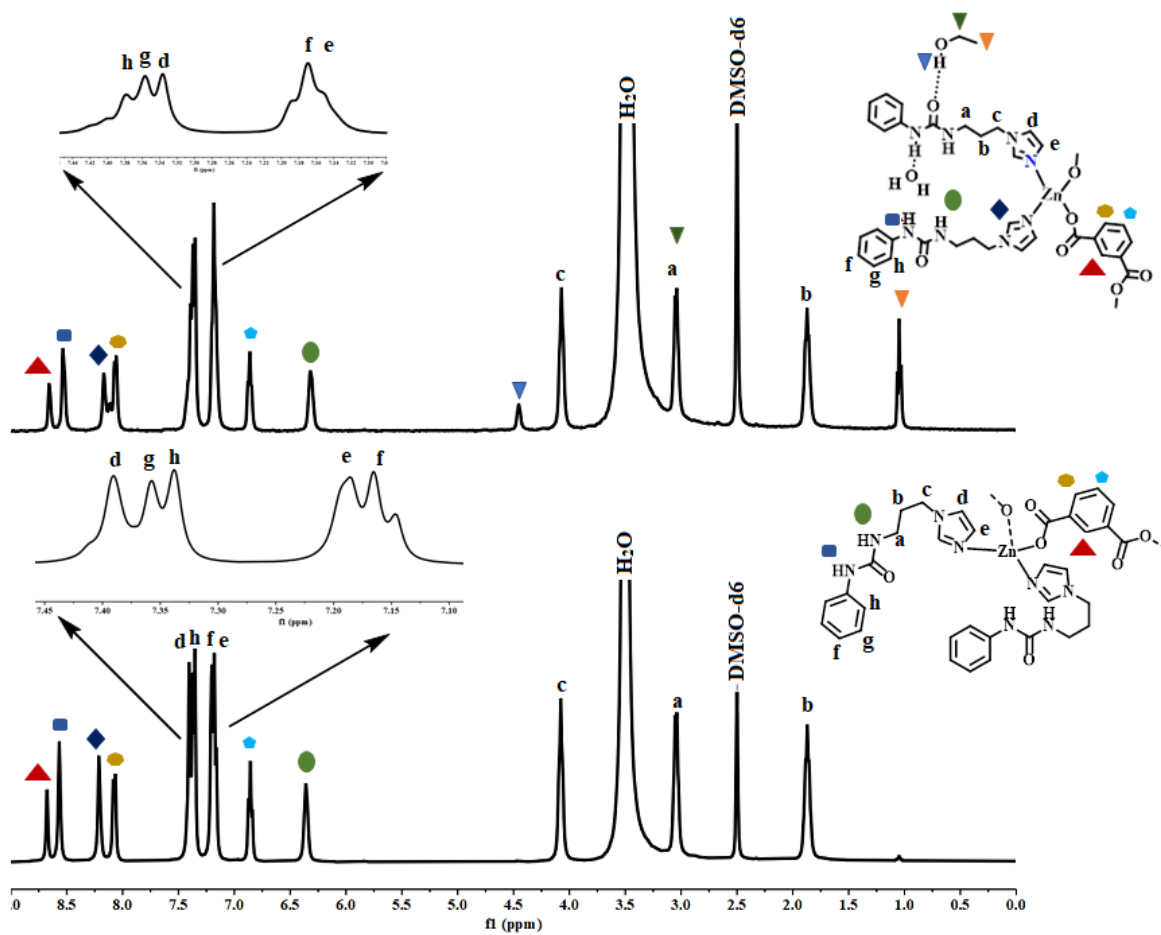

Figure 15S:  $^1\text{H}$ NMR (500MHz) of the **CP1** and **CP2** in  $\text{DMSO-d}_6$

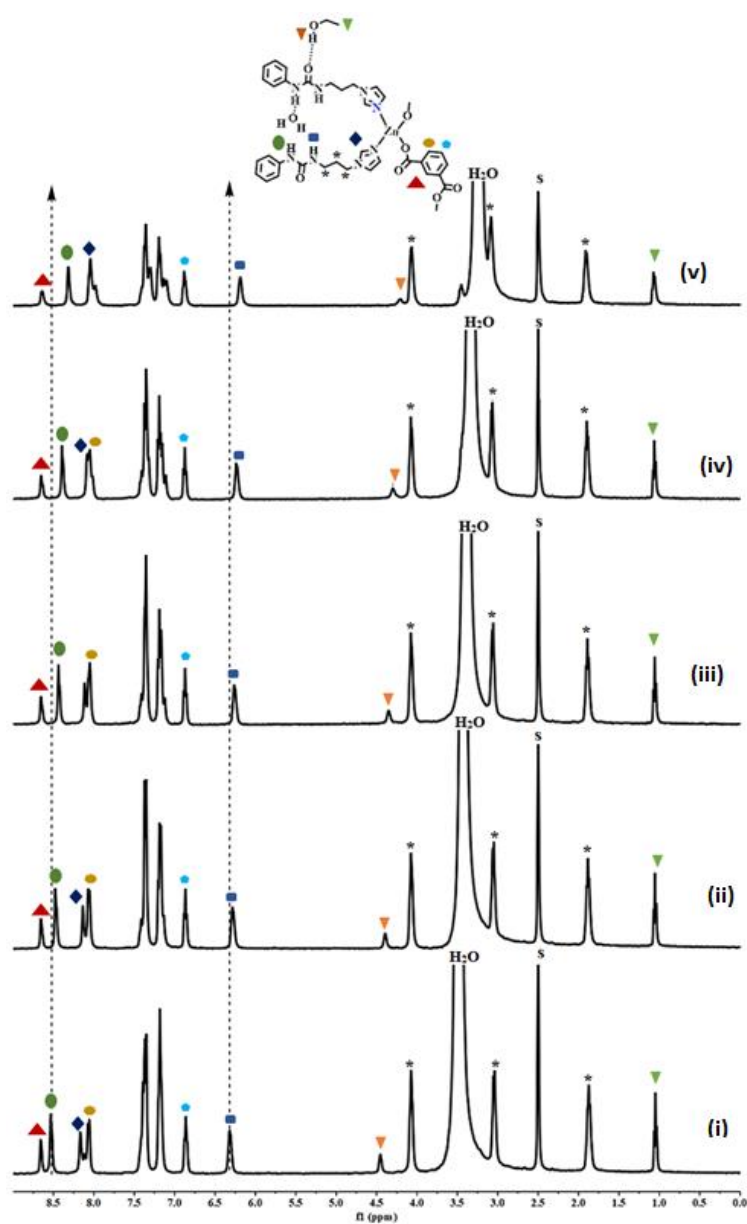

Figure 16S:  $^1\text{H}$ NMR spectra (500 MHz) of the **CP2** in  $\text{DMSO-d}_6$  at (a) 293.15K, (b) 303.15K, (iii) 313.15K, (iv) 323.15K, (v) 333.15K.

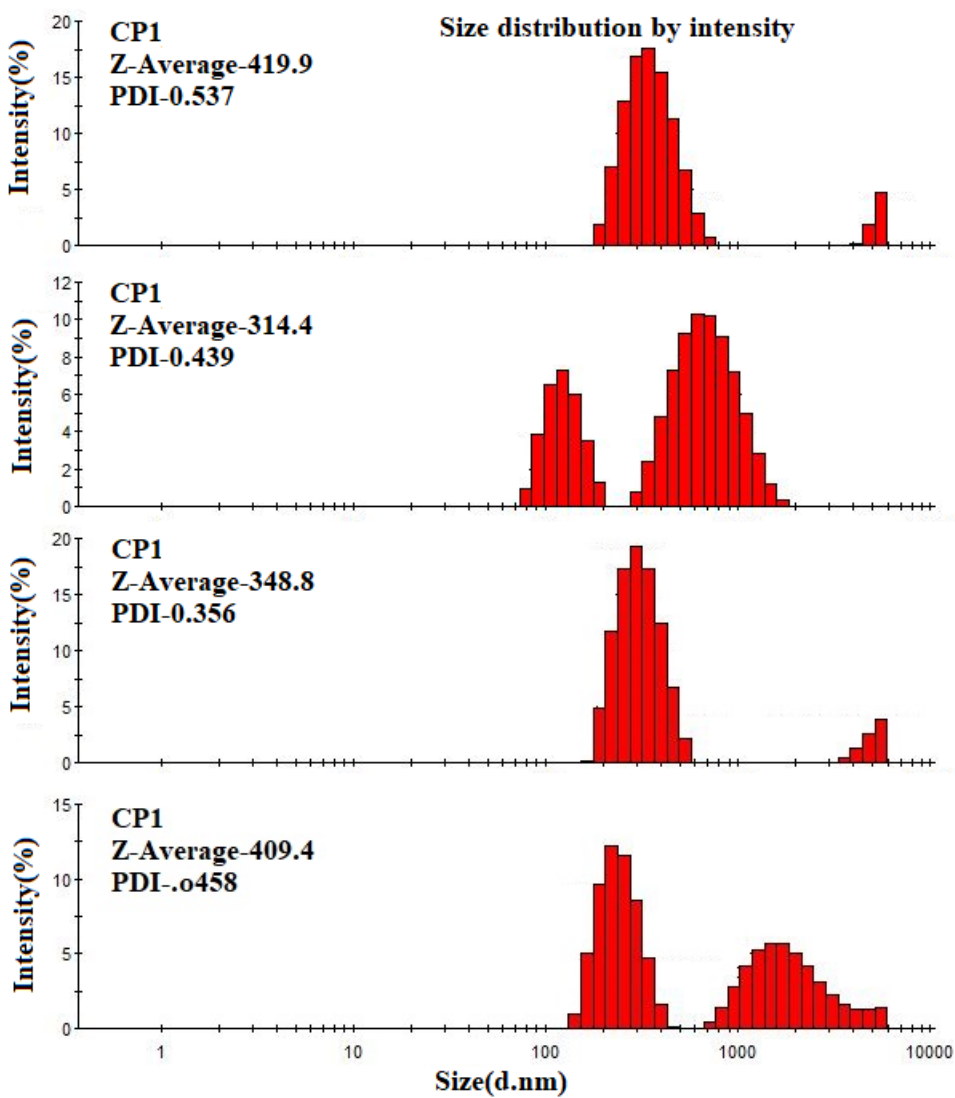

Figure 17S: Plots of intensity vs particle size from dynamic light-scattering of the **CP1** (80  $\mu\text{L}$  of  $10^{-4}\text{M}$ ) with different concentrations of isophthalic acid (0 $\mu\text{L}$ , 10 $\mu\text{L}$ , 20 $\mu\text{L}$ , 30 $\mu\text{L}$   $10^{-4}\text{M}$ , bottom to top) in water.

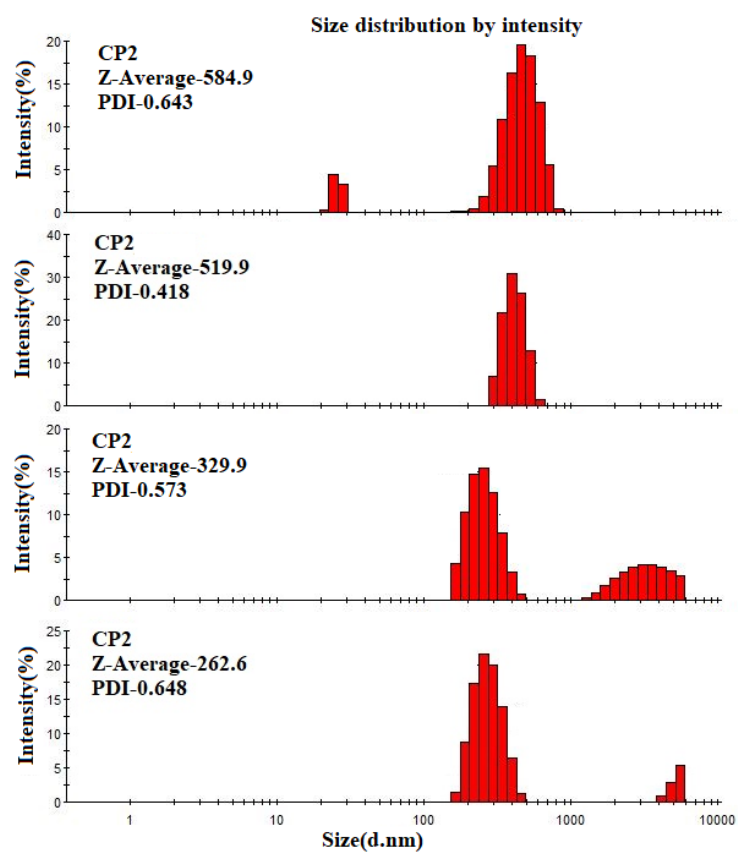

Figure 18S: Plots of intensity vs particle size determined from dynamic light-scattering of **CP2** (80  $\mu\text{L}$  of  $10^{-4}\text{M}$ ) with different concentrations of isophthalic acid (0 $\mu\text{L}$ , 10 $\mu\text{L}$ , 20 $\mu\text{L}$ , 30 $\mu\text{L}$   $10^{-4}\text{M}$ , bottom to top) in water.
